# Supplementary material for: One-pot facile fabrication of covalently cross-linked carbon nanotube/PDMS composite foam as a pressure/temperature sensor with high sensitivity and stability
Source: Royal Society of Chemistry journal article supplement (doi:10.1039/d1tc03523a), 2021-01-01
Supplement: d1tc03523a1.pdf [file d1tc03523a1.pdf]

## Supporting information

### **One-Pot Facile Fabrication of Covalently Cross-Linked Carbon Nanotube/PDMS Composite Foam as a Pressure/ Temperature Sensor with High Sensitivity and Stability**

Cuifen Zhang,<sup>a</sup> Shiqiang Song,<sup>\*a</sup> Qinglan Li,<sup>a</sup> Jincheng Wang<sup>\*a</sup>, Zijin Liu,<sup>b</sup> Shuhua

Zhang,<sup>a</sup> Yong Zhang<sup>c</sup>

<sup>a</sup> College of Chemistry and Chemical Engineering, Shanghai University of Engineering  
Science, Shanghai 201620, P. R. China

<sup>b</sup> School of Textile Materials and Engineering, Wuyi University, Jiangmen, Guangdong  
529020, P. R. China.

<sup>c</sup> State Key Laboratory for Metal Matrix Composite Materials, School of Chemistry and  
Chemical Engineering, Shanghai Jiao Tong University, Shanghai 200240, P. R. China.

Correspondence: polymer\_song@hotmail.com (S. Song); wjc406@126.com (J. Wang)

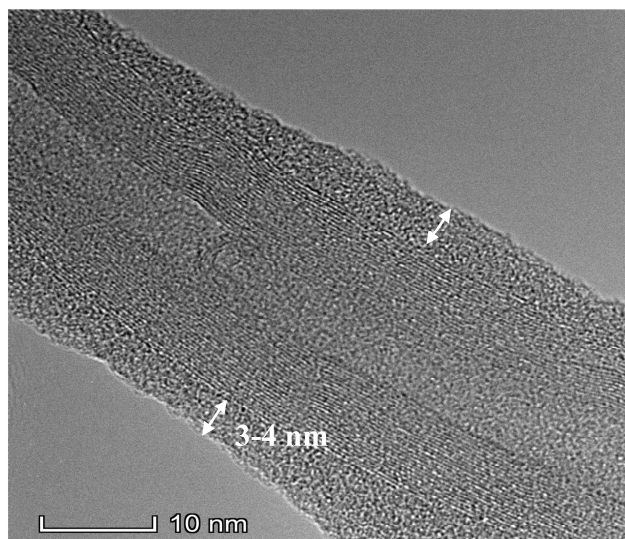

**Figure S1.** TEM image of PDA-CNT

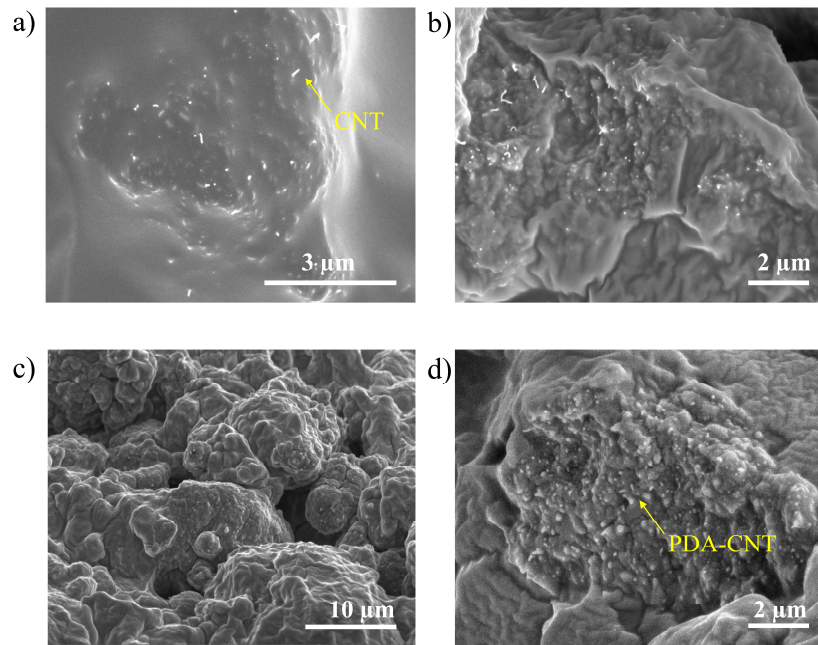

**Figure S2.** SEM images of the cross-section morphology of a-b) the CNT/PDMS and c-d) PDA-CNT/PDMS composite sensors.

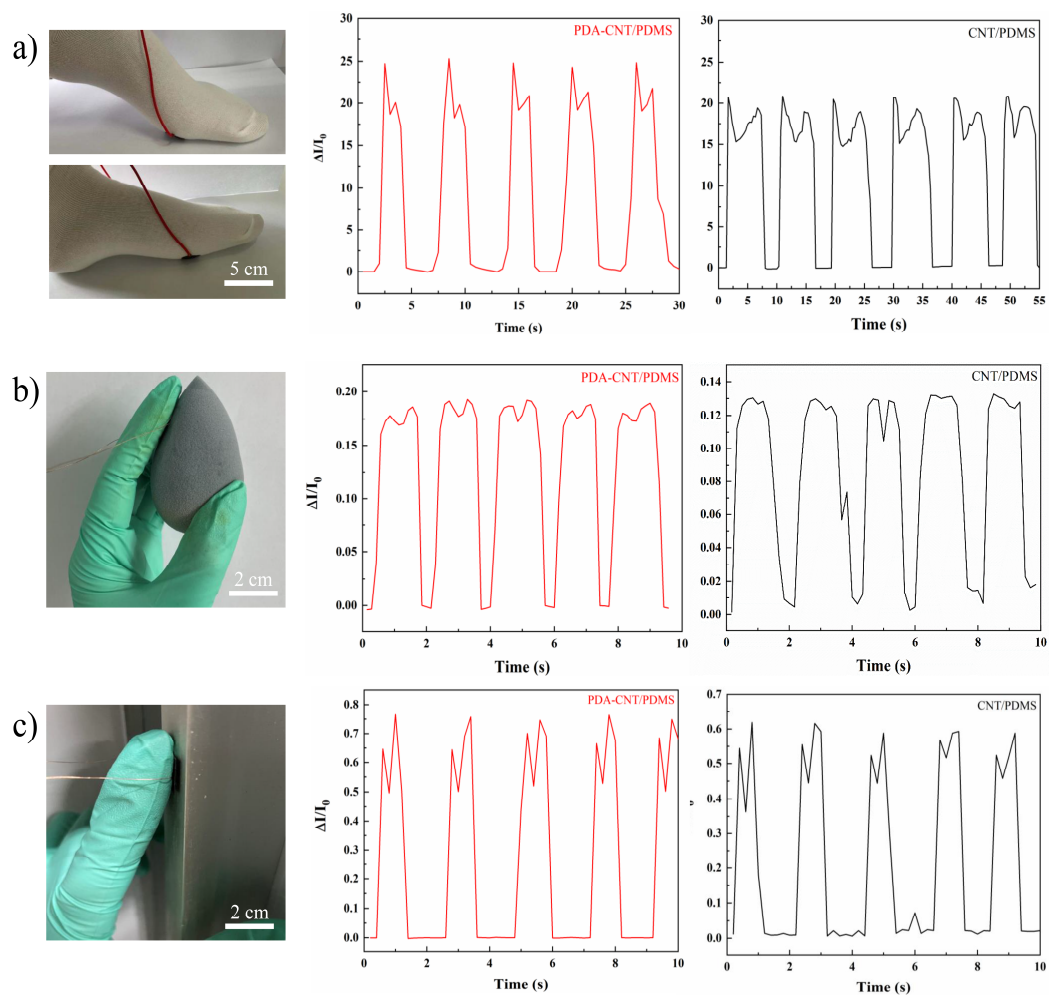

**Figure S3.** Comparison of the signals from the CNT/PDMS and PDA-CNT/PDMS composite sensors for recording the a) foot movement, b) touching light object, c) touching hard object.
